# Supplementary material for: Synthesis of Trifluoromethylated Monoterpene Amino Alcohols
Source: MDPI journal article supplement (doi:10.3390/molecules27207068), 2022-10-20

# Supplementary Materials

## Molecules

### Synthesis of Trifluoromethylated Monoterpene Amino Alcohols

**Polina A. Petrova <sup>1</sup>, Denis V. Sudarikov <sup>1,2,\*</sup>, Larisa L. Frolova <sup>1</sup>, Roman V. Rumyantsev <sup>3</sup>,  
Svetlana A. Rubtsova <sup>1</sup> and Aleksandr V. Kutchin <sup>1</sup>**

<sup>1</sup> Institute of Chemistry, FRC “Komi Scientific Centre”, Ural Branch of the Russian Academy of Sciences Pervomayskaya St. 48, 167000 Syktyvkar, Russia

<sup>2</sup> Biologically Active Terpenoids Laboratory, Kazan Federal University, 18 Kremlevskaya Street, 420008 Kazan, Russia

<sup>3</sup> G.A. Razuvaev Institute of Organometallic Chemistry of Russian Academy of Sciences, 49 Tropinina St., 603950 Nizhny Novgorod, Russia

\* Correspondence: sudarikov-dv@chemi.komisc.ru

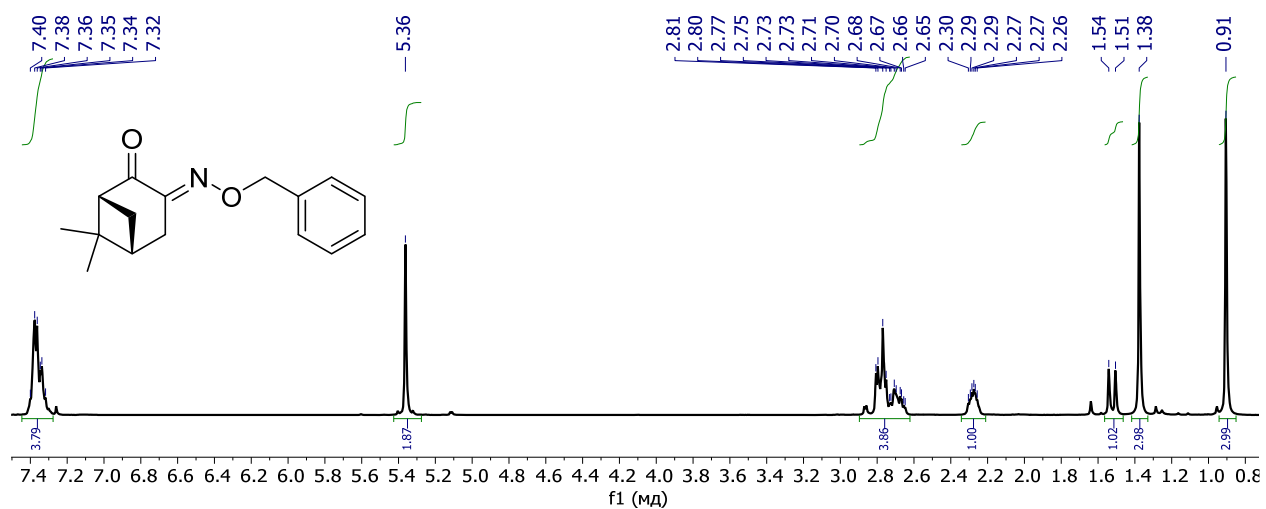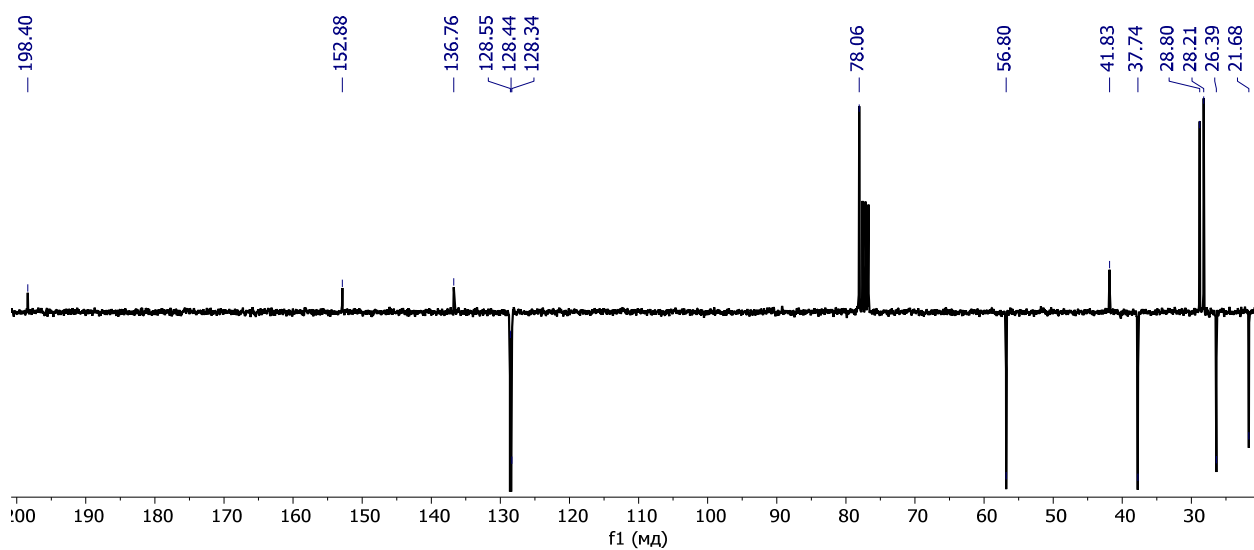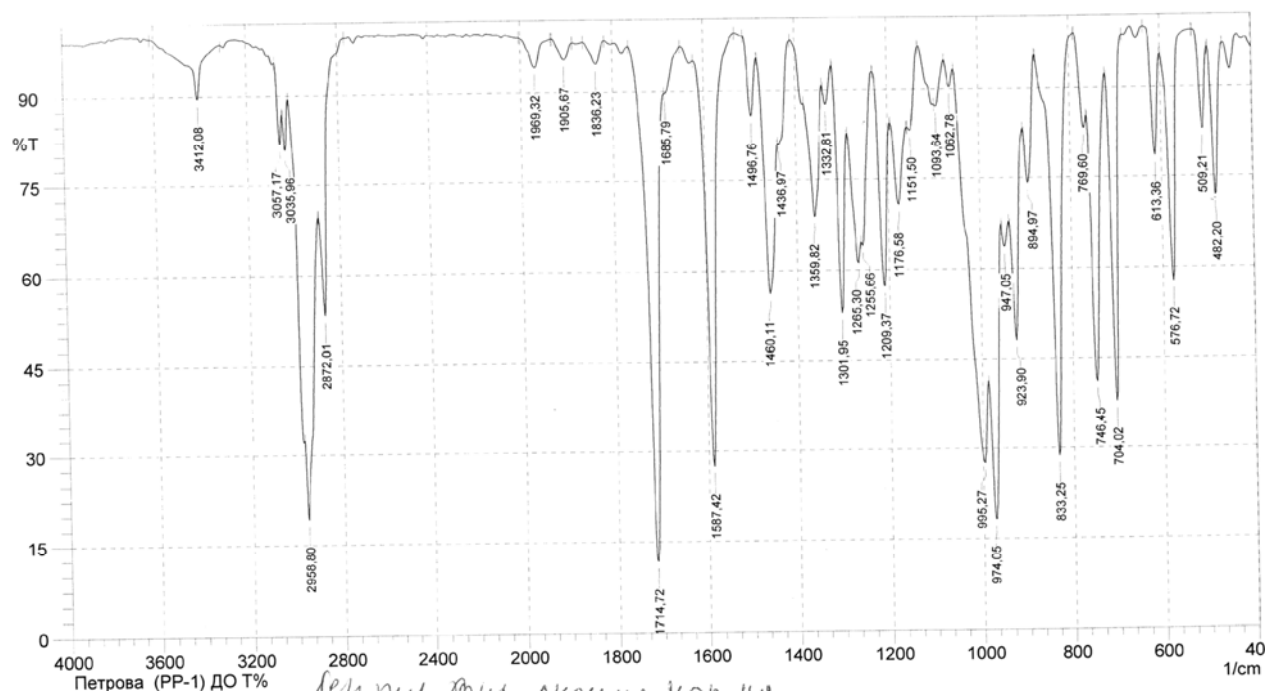

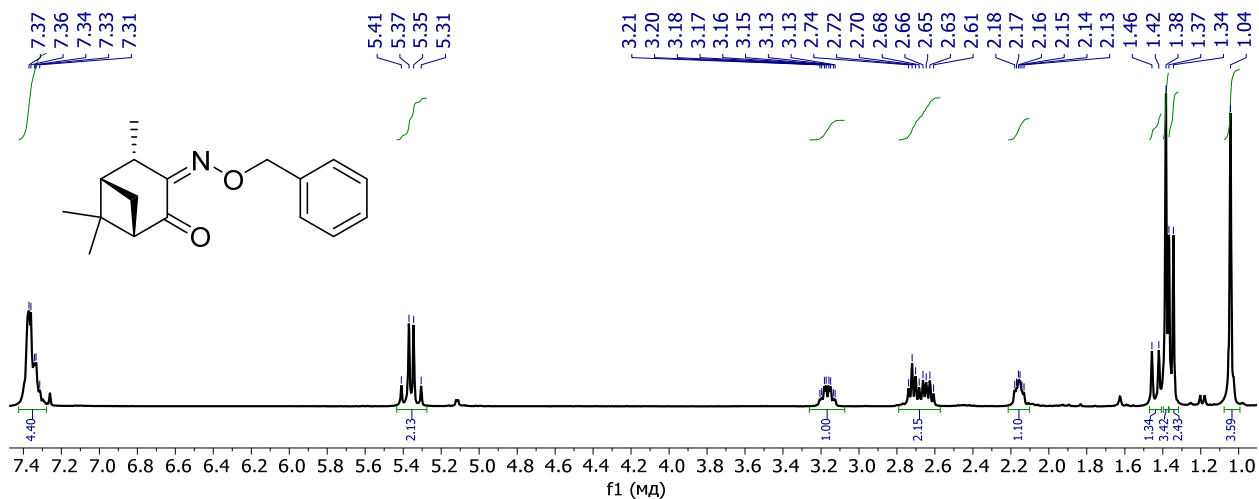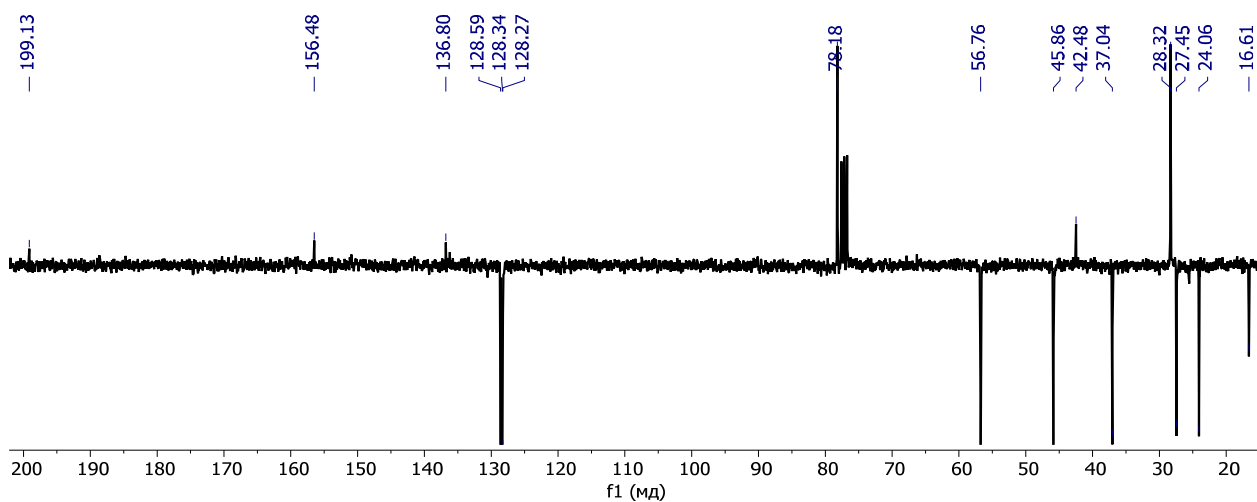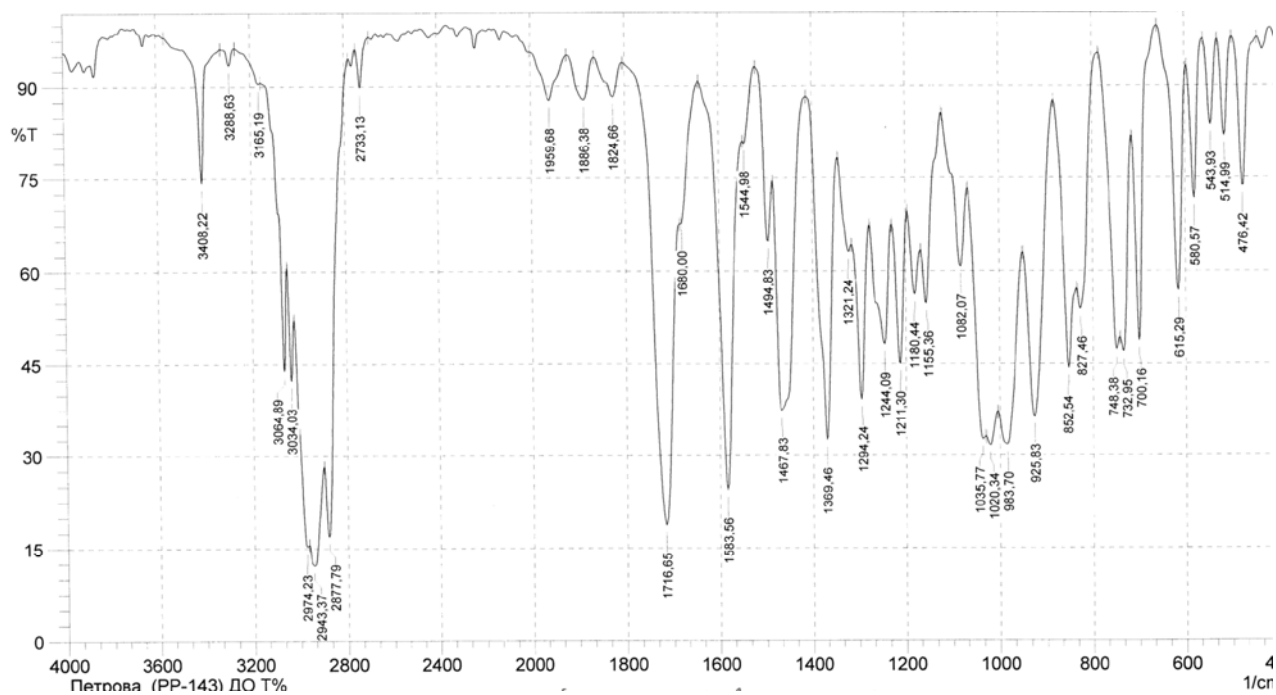

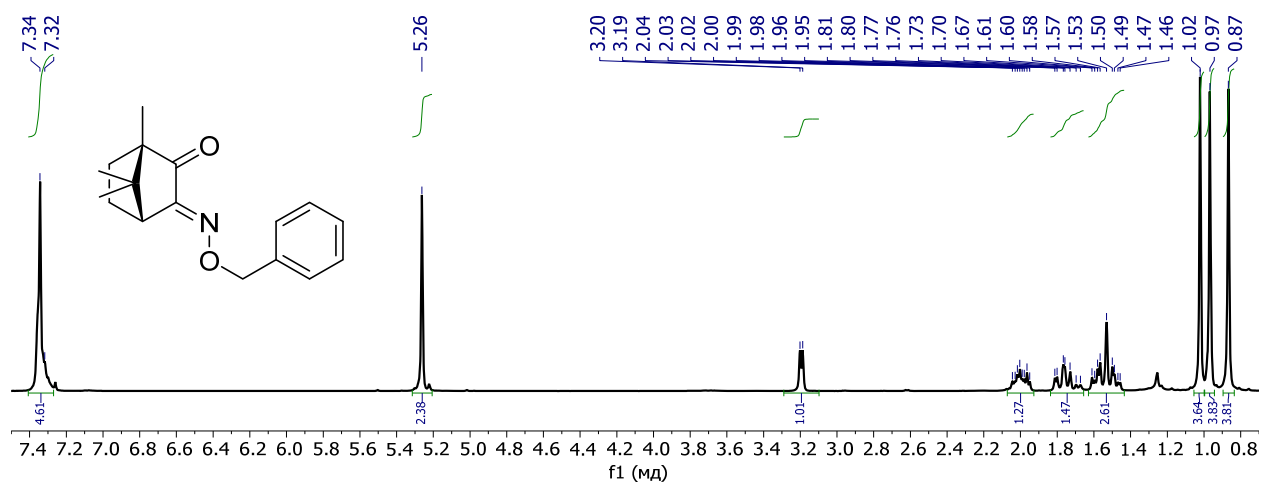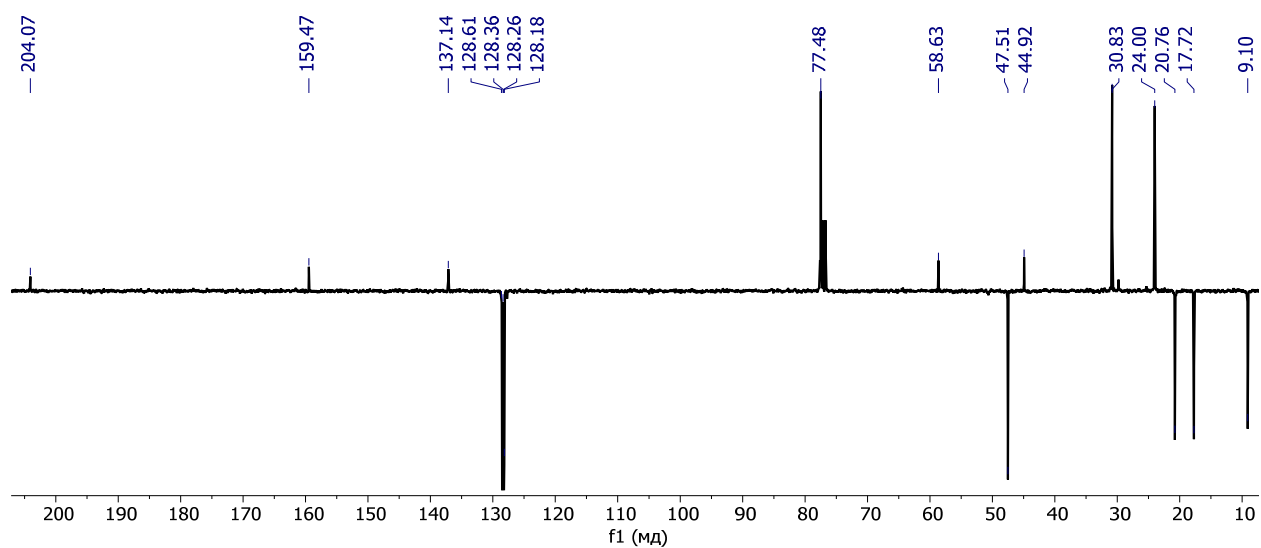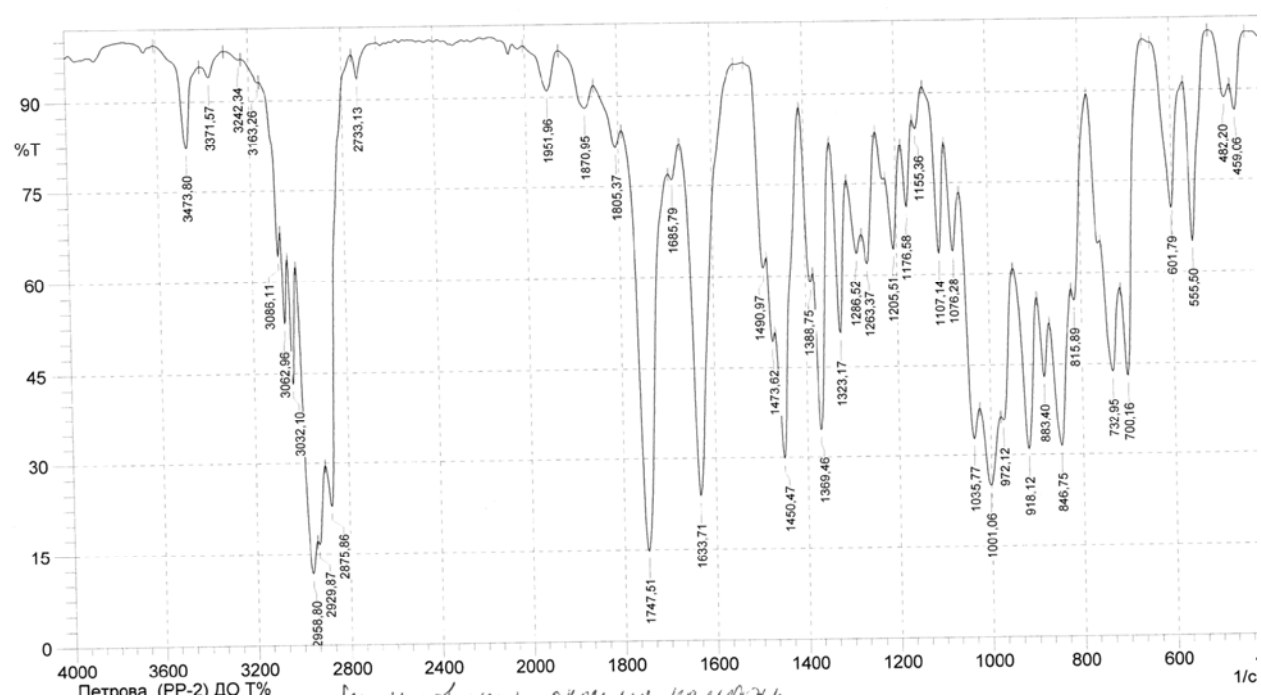

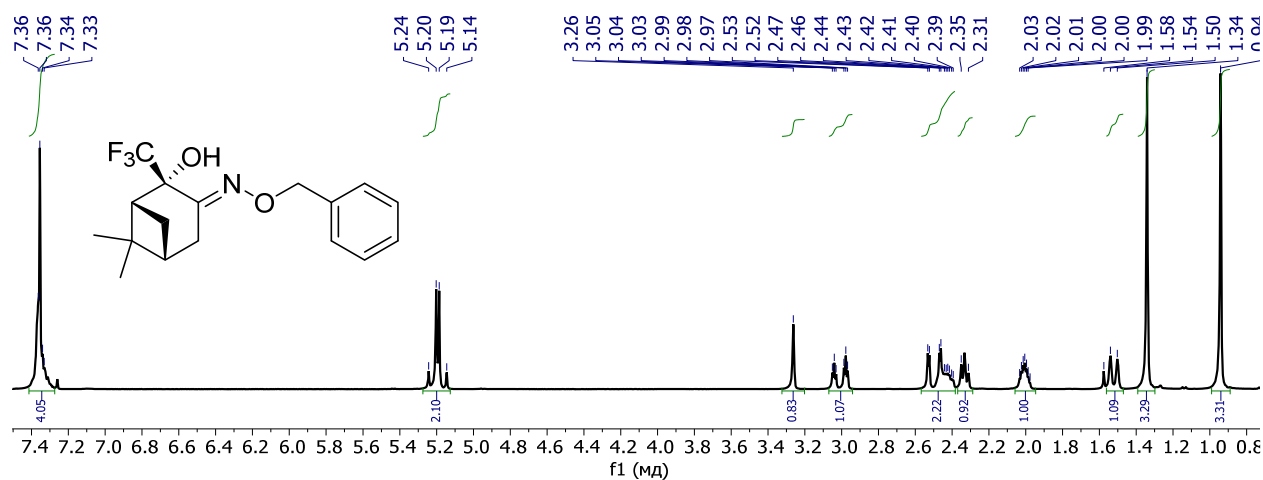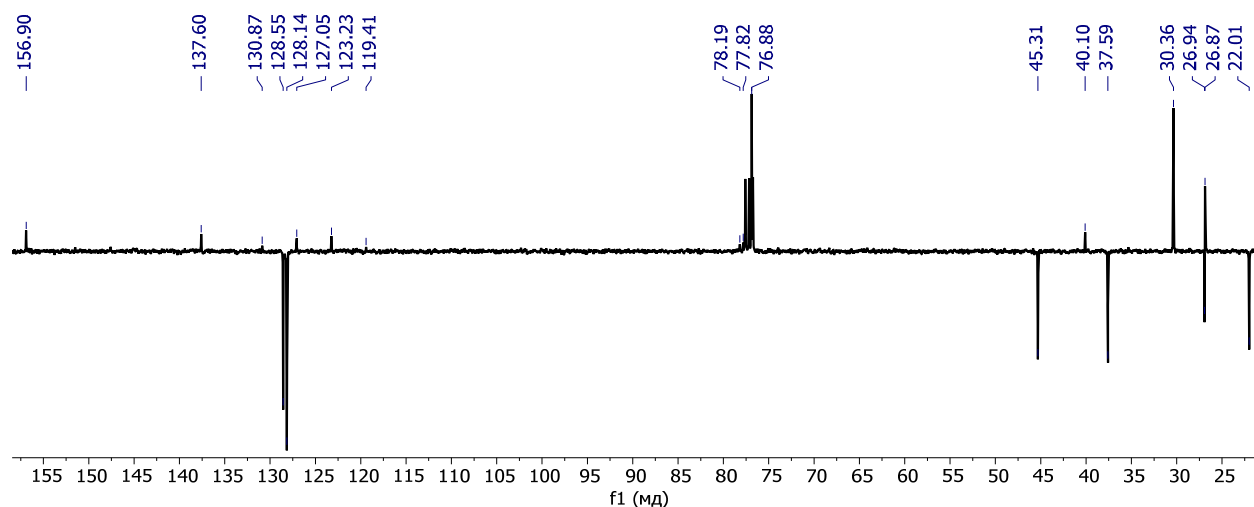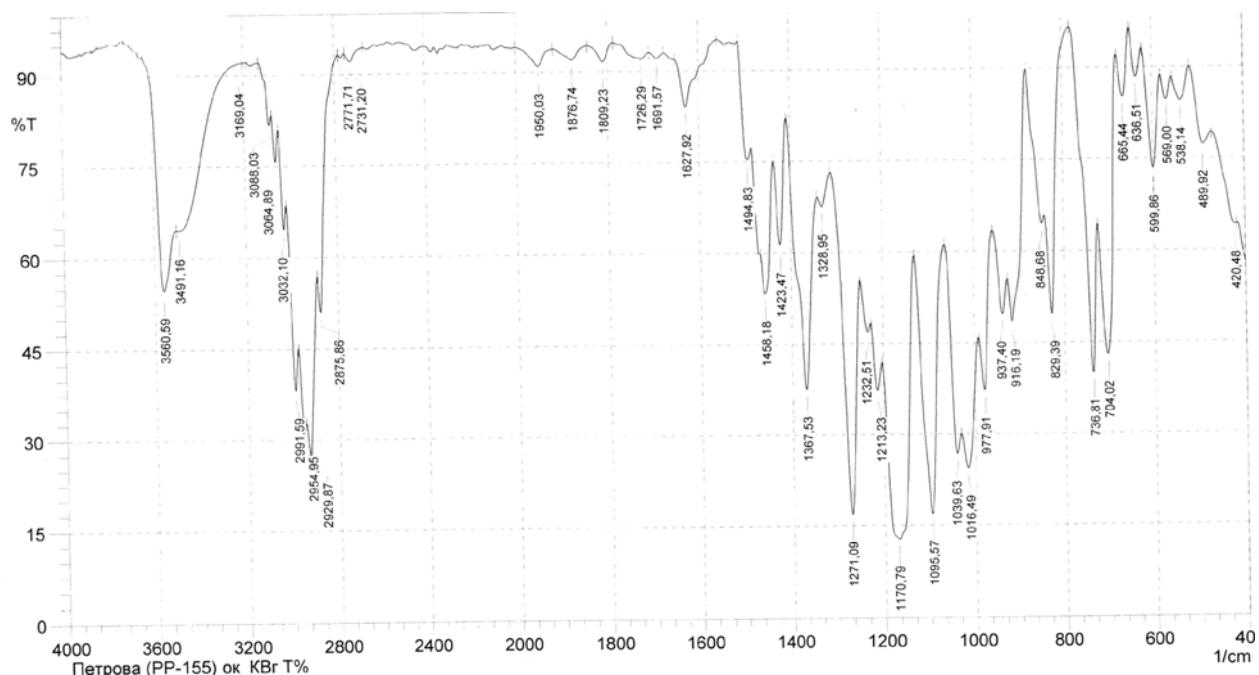

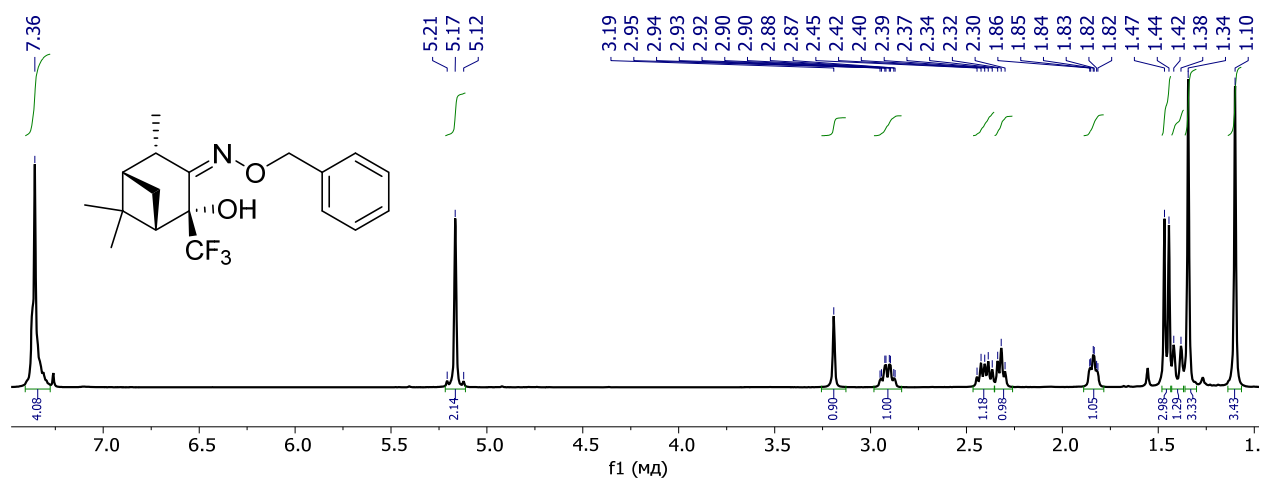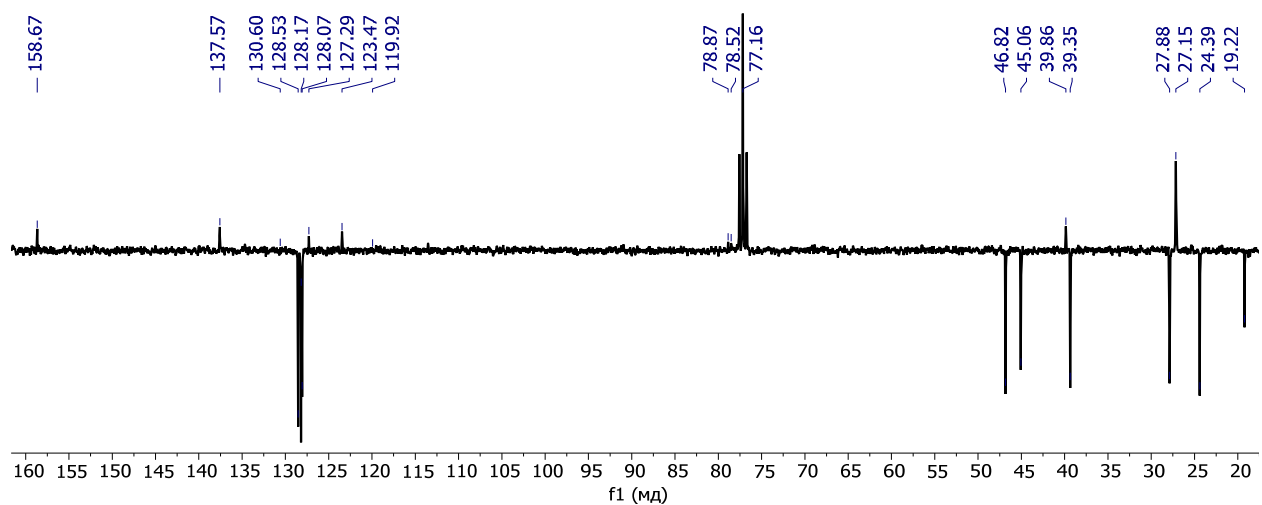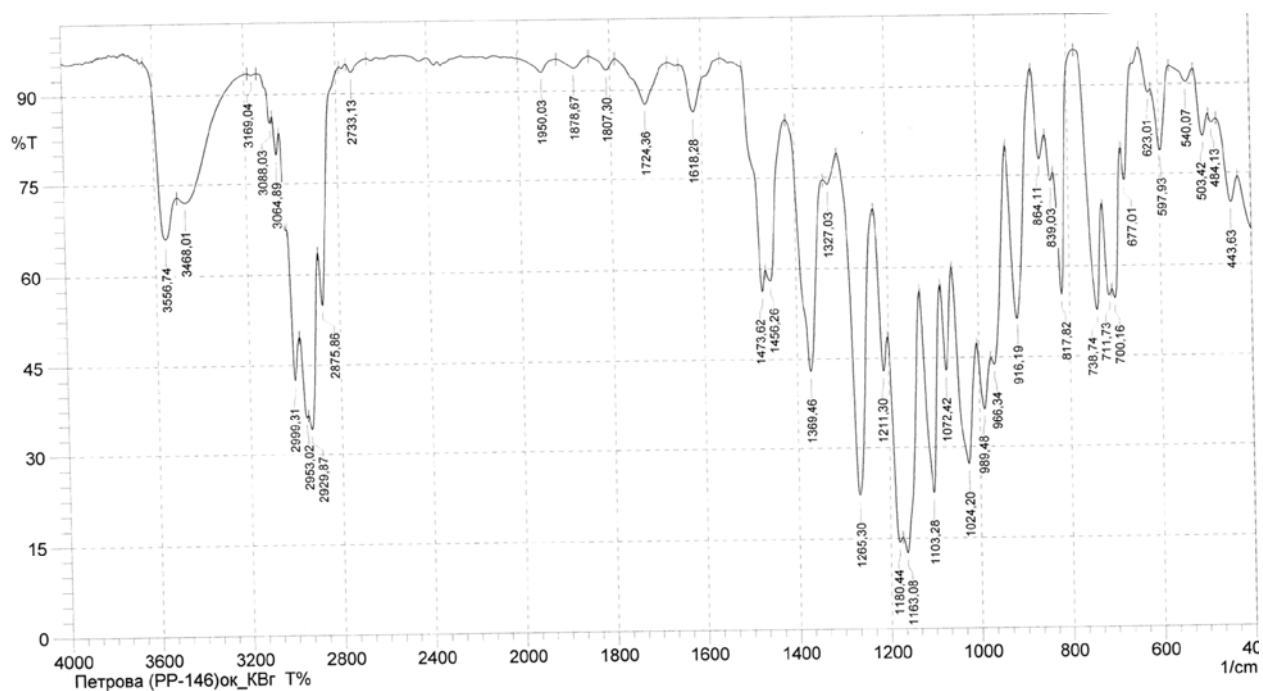



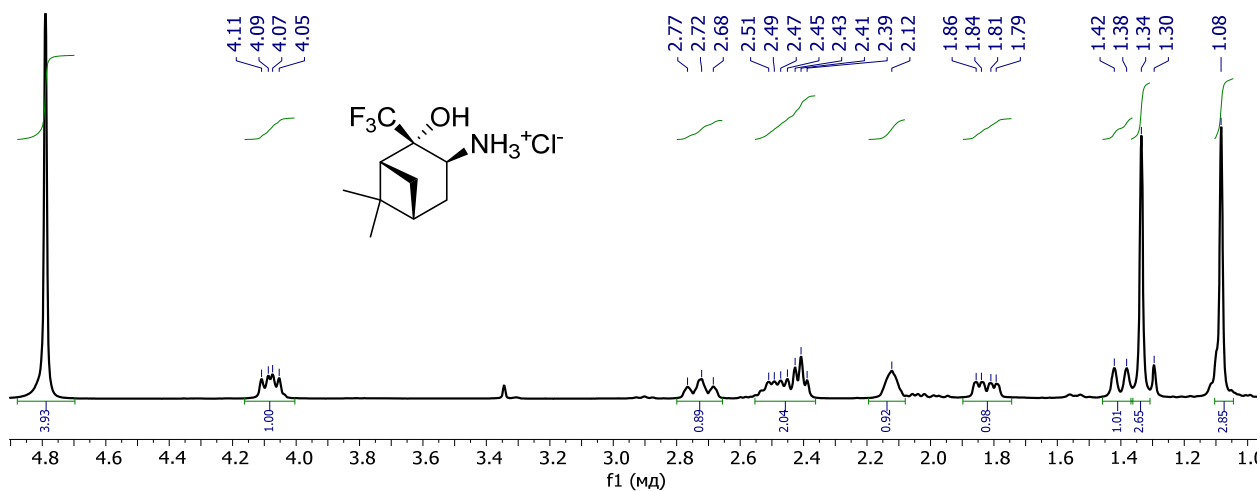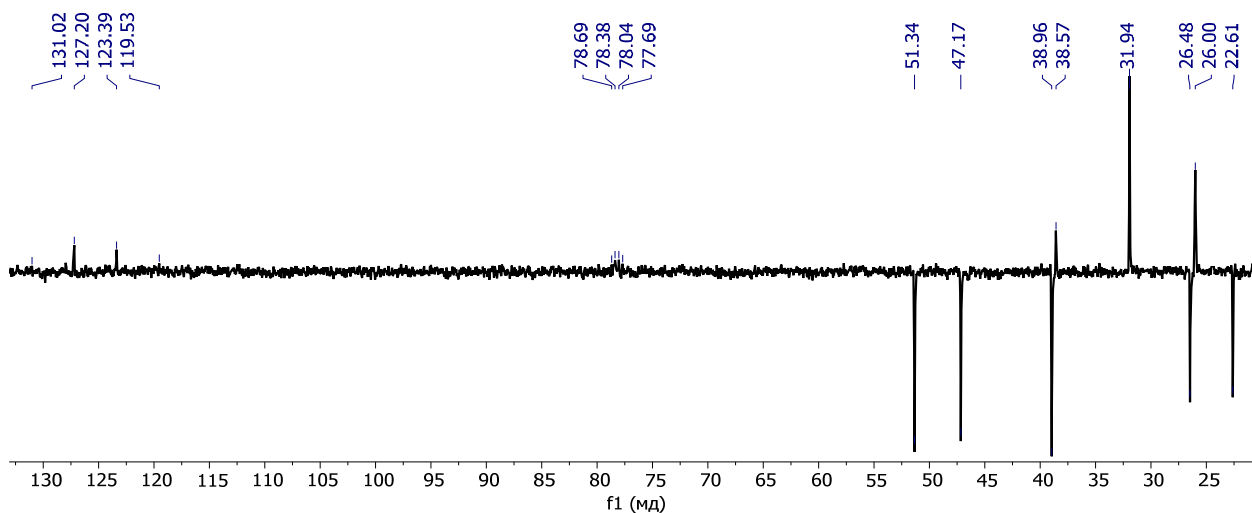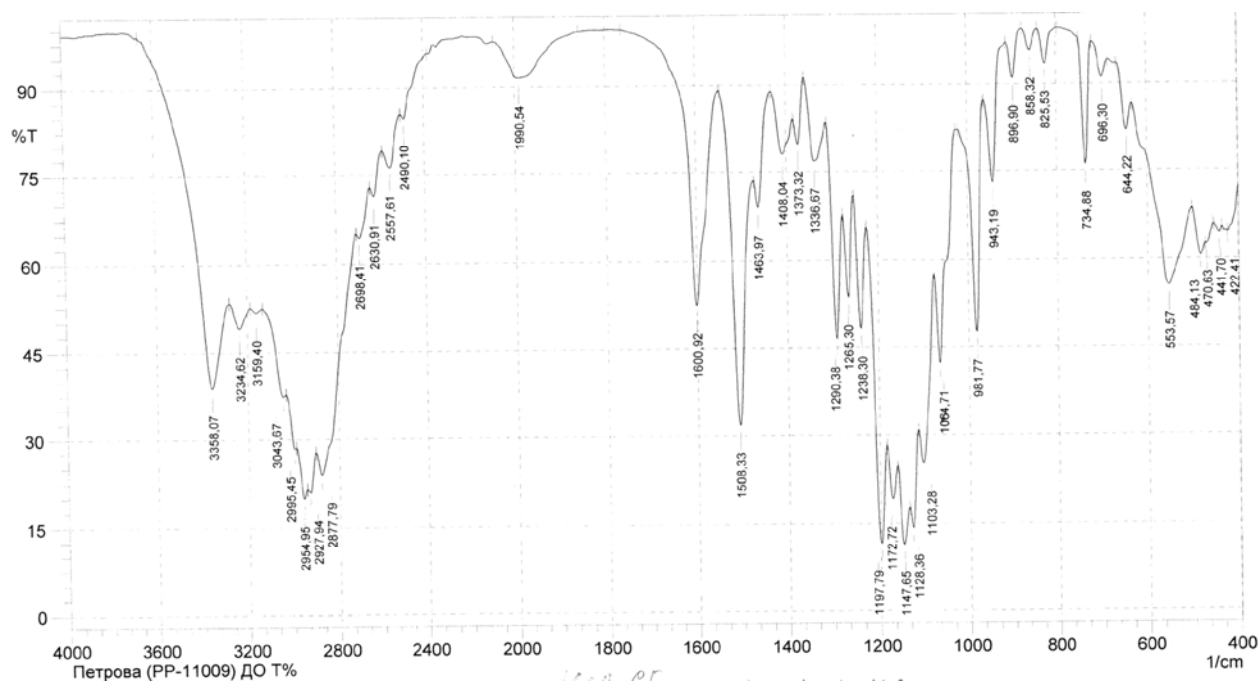



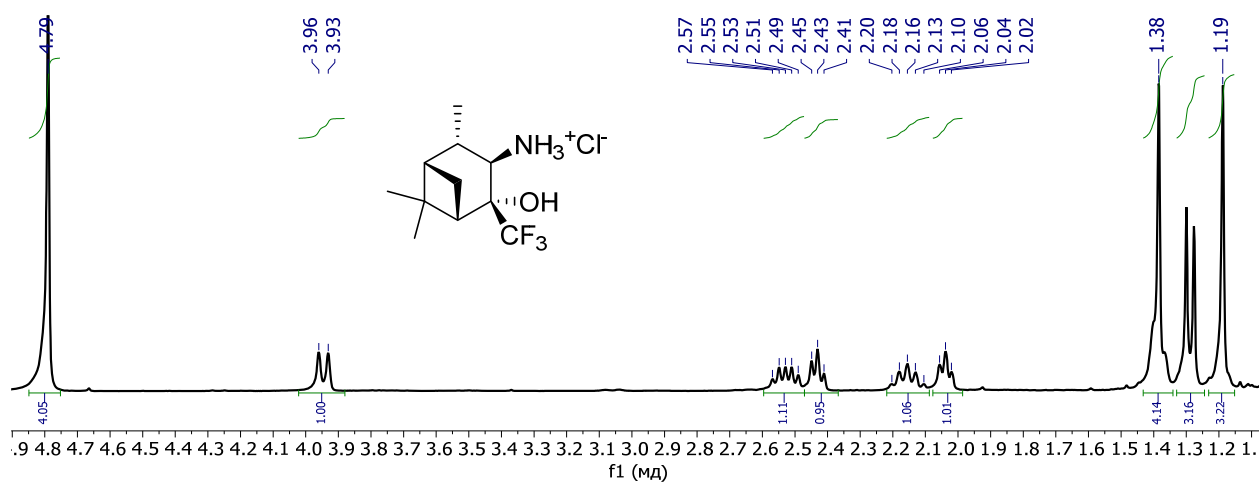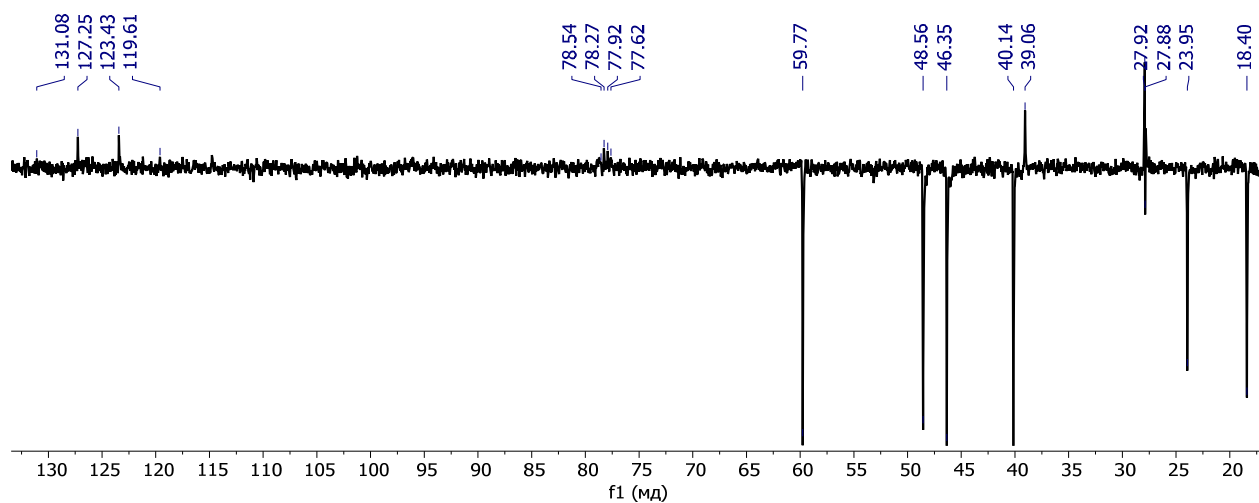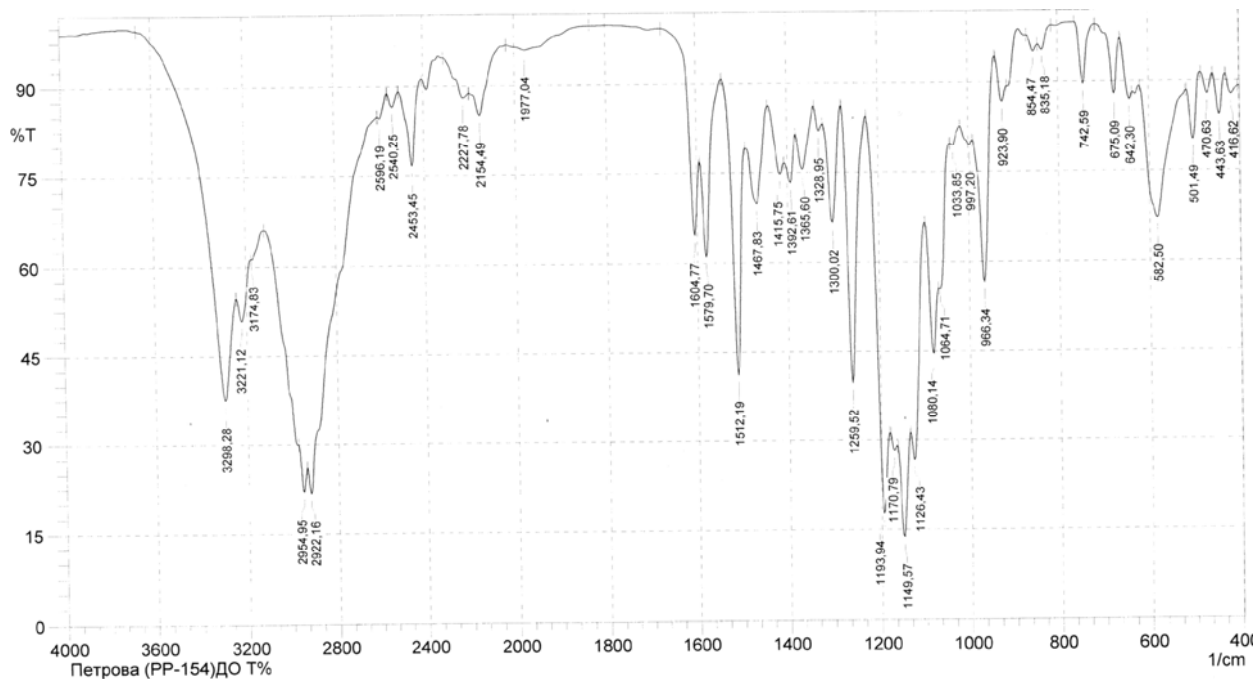

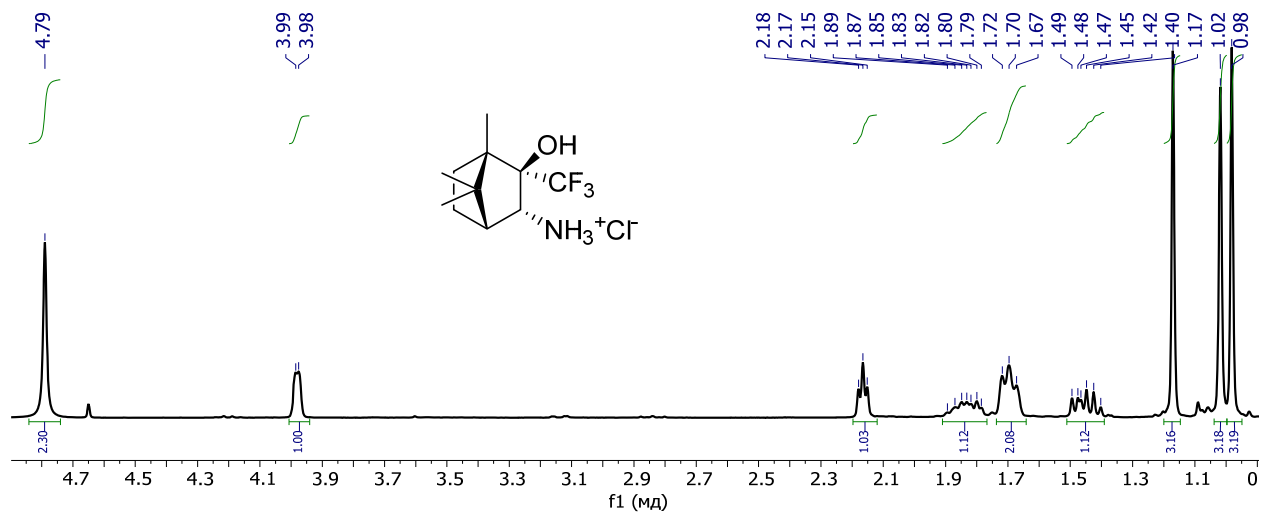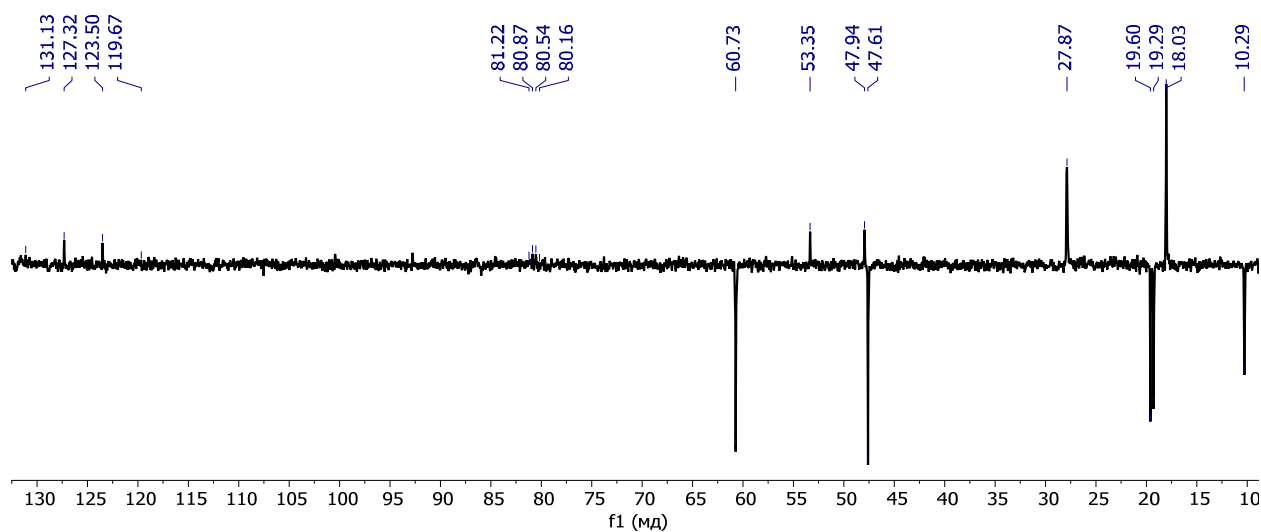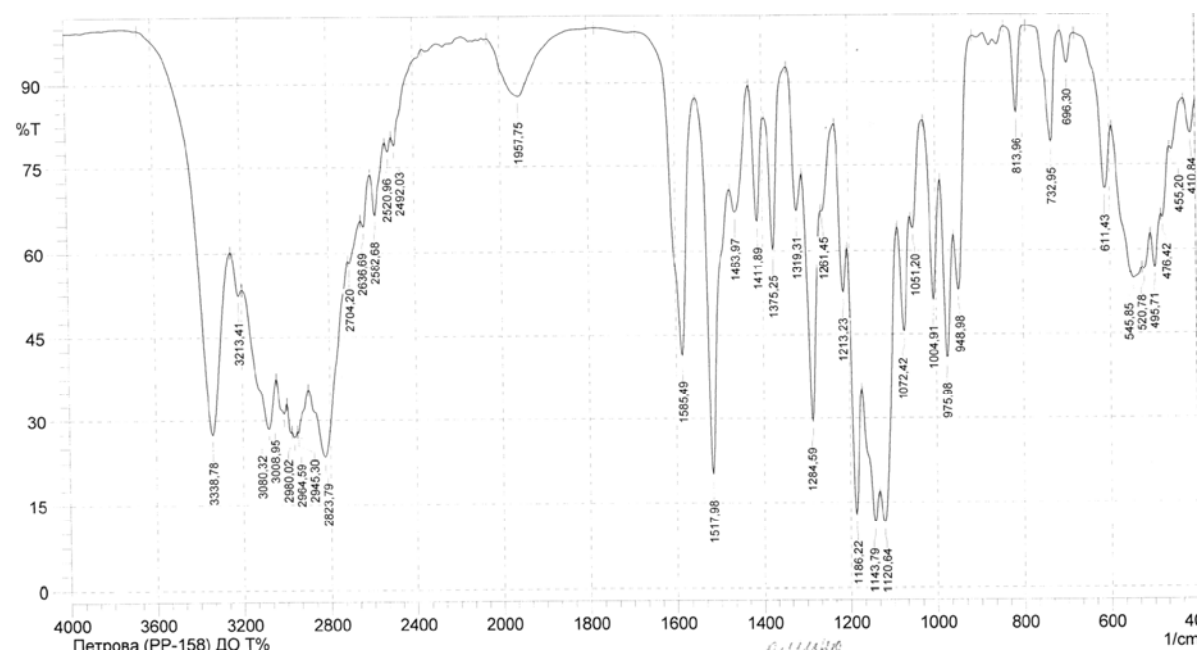

Supplement: s1 [file s1]
